# Supplementary material for: Oxygen vacancy-engineered surfaces of ZnO-decorated porous BiOI microspheres for strongly enhanced visible-light NO oxidation
Source: Royal Society of Chemistry journal article supplement (doi:10.1039/d1cy00040c), 2021-01-01
Supplement: d1cy00040c1.pdf [file d1cy00040c1.pdf]

Electronic Supplementary Information (ESI)

**Oxygen Vacancy-Engineered Surfaces of ZnO Decorated  
Porous BiOI Microspheres for Strongly Enhanced Visible  
Light NO oxidation**

Ruhua Zha,<sup>a</sup> Tuo Shi,<sup>b</sup> Chao Li,<sup>a</sup> He Liu,<sup>c</sup> Min Zhang<sup>a\*</sup>

<sup>a</sup> College of Chemistry and Chemical Engineering, Xinyang Normal University, Xinyang 464000, P. R. China.

<sup>b</sup> Key Laboratory of Microelectronic Devices and Integrated Technology, Institute of Microelectronics, Chinese Academy of Sciences, Beijing 100029, P. R. China.

<sup>c</sup> Department of Medicinal Chemistry, Virginia Commonwealth University, Richmond, Virginia, USA

\* Author to whom correspondence should be addressed.

Tel: +86-376-6390232; Fax: +86-376-6390232; E-mail: [zm201177055@sina.com](mailto:zm201177055@sina.com)

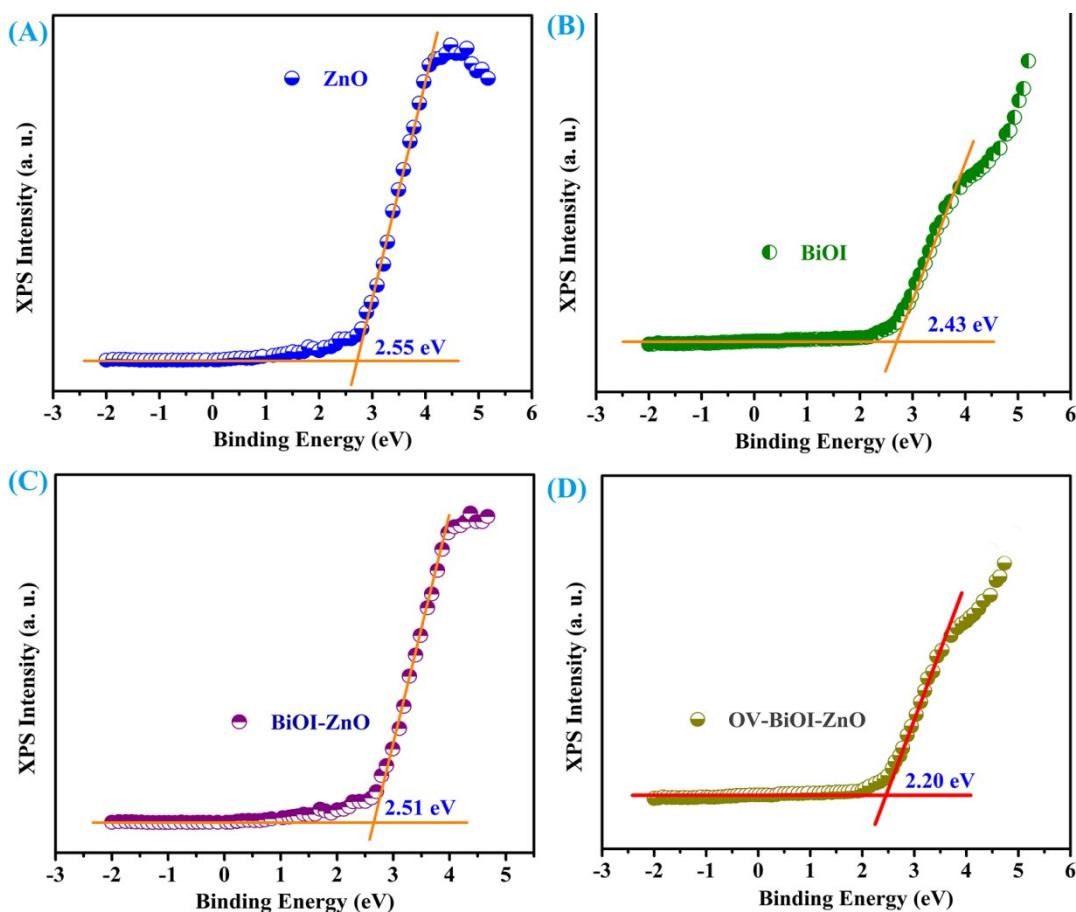

**Fig. S1** The VB spectra of ZnO (A), BiOI (B), BiOI-ZnO (C) and OV-BiOI-ZnO (D) heterostructures.
